# Supplementary material for: Characterization of tick organic anion transporting polypeptides (OATPs) upon bacterial and viral infections
Source: PubMed Central journal article supplement (PMC6236954; doi:10.1186/s13071-018-3160-6), 2018-11-14
Supplement: 13071_2018_3160_MOESM1_ESM.pdf [file 13071_2018_3160_MOESM1_ESM.pdf]

**Characterization of tick organic anion transporting polypeptides (OATPs) upon  
bacterial and viral infections**

Vikas Taank <sup>1</sup>, Wenshuo Zhou <sup>1</sup>, Xuran Zhuang <sup>2</sup>, John F. Anderson <sup>3</sup>, Utpal Pal <sup>2</sup>,  
Hameeda Sultana <sup>1,4</sup> and Girish Neelakanta <sup>1,4,\*</sup>

**Additional file 1**

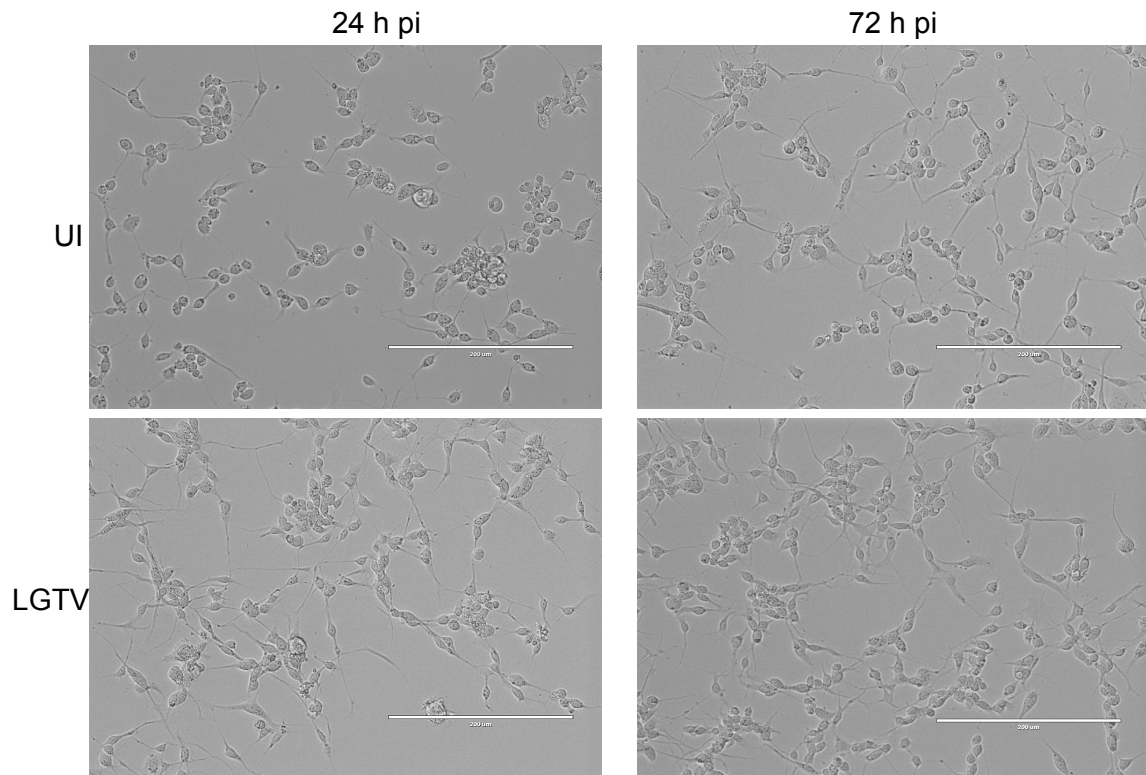

**Figure S1.** LGTV infection has no impact on tick cell morphology. A) Representative phase contrast images of uninfected or LGTV-infected tick cells at 24 and 72 h pi. UI indicates uninfected and LGTV indicates LGTV-infected tick cells. Scale bars: 200 µm

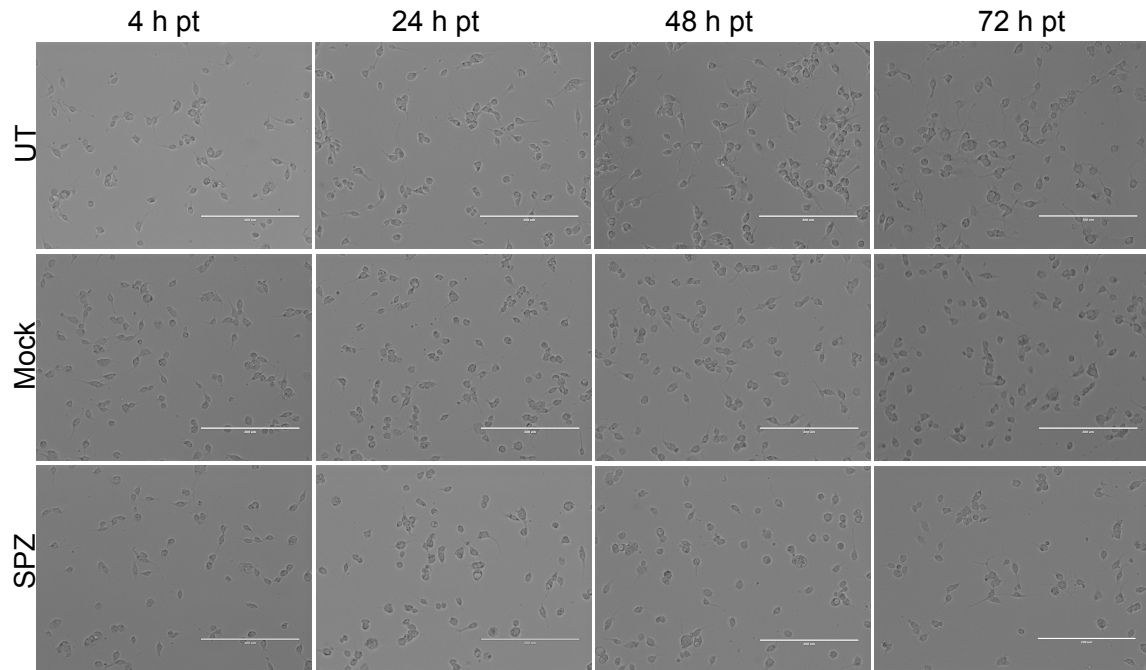

**Figure S2.** SPZ treatment has no cytotoxic effects on tick cells. Representative phase contrast images of untreated or mock- or 100  $\mu$ M of SPZ uninfected tick cells at 4, 24, 48 and 72 h post treatment (pt) are shown. Scale bars: 200  $\mu$ m

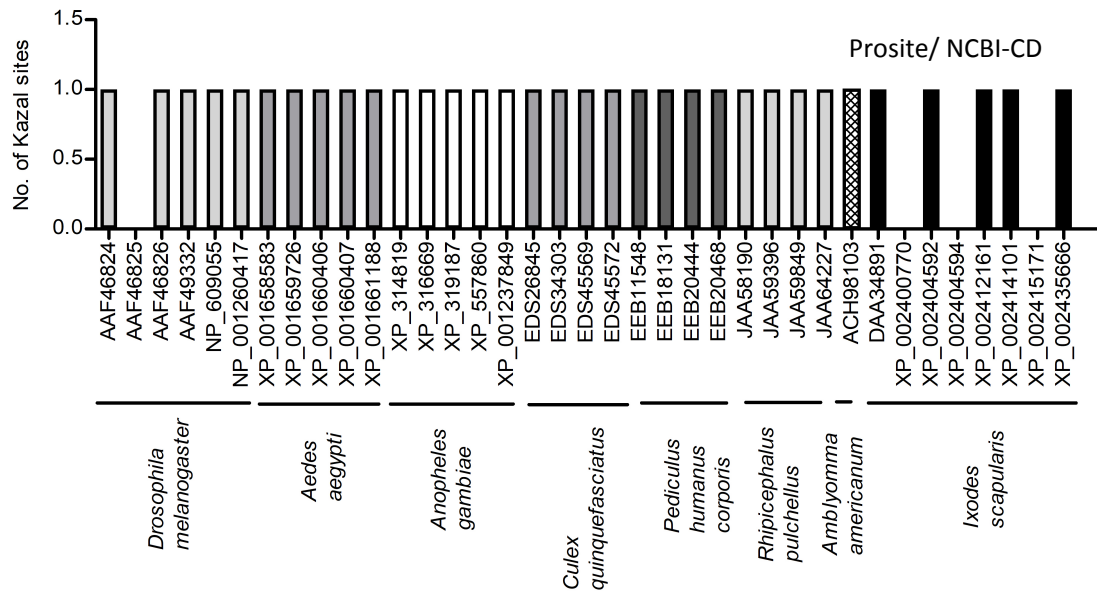

**Figure S3.** Analysis of Kazal domain sites in OATPs from medically important vectors. Amino acid sequences of OATPs were individually analyzed at NCBI conserved domain search and PROSITE databases for prediction of Kazal domain sites in several OATPs. Histograms represent number of KAZAL sites for each OATP. Full-length OATP sequences were considered to determine KAZAL sites. GenBank accession numbers and organism names are shown at the bottom of the figure.

**Table S1:** Summarizing statistical test outcomes for the data in this paper.

| Figure | Gene              | Samples                                          | Student's t test<br>(P value) | Mann Whitney test<br>(P value) |
|--------|-------------------|--------------------------------------------------|-------------------------------|--------------------------------|
| 1 A    | <i>isoatp0726</i> | Uninfected, <i>Borrelia burgdorferi</i> infected | 0.4881                        | 0.7959                         |
| 1 B    | <i>isoatp2114</i> |                                                  | 0.3707                        | 0.4359                         |
| 1 C    | <i>isoatp2116</i> |                                                  | 0.8931                        | 0.2428                         |
| 1 D    | <i>isoatp4056</i> |                                                  | 0.5938                        | 0.0753                         |
| 1 E    | <i>isoatp4134</i> |                                                  | 0.6086                        | 1.0000                         |
| 1 F    | <i>isoatp4548</i> |                                                  | 0.4358                        | 0.2799                         |
| 1 G    | <i>isoatp4550</i> |                                                  | 0.5152                        | 0.4967                         |
| 1 H    | <i>isoatp5126</i> |                                                  | 0.1765                        | 0.7959                         |
| 1 I    | <i>isoatp5621</i> |                                                  | 0.9685                        | 0.7959                         |
| 1 J    | <i>kat</i>        |                                                  | 0.0571                        | 0.0605                         |
| 1 K    | <i>FlaB</i>       |                                                  | <b>0.0175</b>                 | <b>&lt; 0.0001</b>             |
| 2 A    | <i>isoatp0726</i> | Uninfected, LGTV infected ticks                  | 0.8088                        | 0.7959                         |
| 2 B    | <i>isoatp2114</i> |                                                  | 0.5110                        | 0.8534                         |
| 2 C    | <i>isoatp2116</i> |                                                  | 0.8414                        | 0.4813                         |
| 2 D    | <i>isoatp4056</i> |                                                  | 0.2193                        | 0.5288                         |
| 2 E    | <i>isoatp4134</i> |                                                  | 0.1787                        | 0.6038                         |
| 2 F    | <i>isoatp4548</i> |                                                  | 0.4263                        | 0.9188                         |
| 2 G    | <i>isoatp4550</i> |                                                  | 0.7449                        | 1.0000                         |
| 2 H    | <i>isoatp5126</i> |                                                  | 0.1912                        | 0.3562                         |
| 2 I    | <i>isoatp5621</i> |                                                  | 0.6316                        | 0.3930                         |
| 2 J    | <i>kat</i>        |                                                  | 0.2064                        | 0.2756                         |
| 2 K    | LGTV +            |                                                  | <b>&lt; 0.0001</b>            | <b>&lt; 0.0001</b>             |
| 2 L    | LGTV -            | <b>&lt; 0.0001</b>                               | <b>&lt; 0.0001</b>            |                                |
| 3 A    | <i>isoatp0726</i> | 24 h, Uninfected, LGTV infected tick cells       | 0.1813                        | 0.1797                         |
| 3 B    | <i>isoatp2114</i> |                                                  | <b>0.0010</b>                 | <b>0.0022</b>                  |
| 3 C    | <i>isoatp2116</i> |                                                  | 0.1255                        | 0.1320                         |
| 3 D    | <i>isoatp4056</i> |                                                  | 0.0960                        | 0.0931                         |
| 3 E    | <i>isoatp4134</i> |                                                  | 0.1180                        | 0.1320                         |
| 3 F    | <i>isoatp4548</i> |                                                  | <b>0.0059</b>                 | <b>0.0152</b>                  |
| 3 G    | <i>isoatp4550</i> |                                                  | <b>0.0325</b>                 | <b>0.0411</b>                  |
| 3 H    | <i>isoatp5126</i> |                                                  | <b>0.0191</b>                 | <b>0.0152</b>                  |
| 3 I    | <i>isoatp5621</i> |                                                  | 0.5253                        | 0.8182                         |
| 3 J    | <i>kat</i>        |                                                  | 0.5463                        | 0.8182                         |
| 3 K    | LGTV +            |                                                  | <b>&lt; 0.0001</b>            | <b>0.0022</b>                  |
| 3 A    | <i>isoatp0726</i> | 72 h, Uninfected, LGTV infected tick cells       | 0.0767                        | 0.0931                         |
| 3 B    | <i>isoatp2114</i> |                                                  | 0.6696                        | 0.6991                         |
| 3 C    | <i>isoatp2116</i> |                                                  | 0.0946                        | 0.1320                         |
| 3 D    | <i>isoatp4056</i> |                                                  | 0.0963                        | 0.0931                         |
| 3 E    | <i>isoatp4134</i> |                                                  | 0.2200                        | 0.2403                         |
| 3 F    | <i>isoatp4548</i> |                                                  | 0.2021                        | 0.1255                         |
| 3 G    | <i>isoatp4550</i> |                                                  | 0.1999                        | 0.3939                         |
| 3 H    | <i>isoatp5126</i> |                                                  | 0.2964                        | 0.6991                         |
| 3 I    | <i>isoatp5621</i> |                                                  | 0.2257                        | 0.9372                         |
| 3 J    | <i>kat</i>        |                                                  | 0.9894                        | 0.6991                         |
| 3 K    | LGTV +            |                                                  | <b>&lt; 0.0001</b>            | <b>0.0022</b>                  |
| 4 B    | LGTV              | Mock, SPZ treatment                              | <b>0.0252</b>                 | <b>0.0418</b>                  |
| 5 A    | <i>isoatp0726</i> | Mock, SPZ treatment                              | <b>0.0216</b>                 | <b>0.0350</b>                  |
| 5 B    | <i>isoatp2114</i> |                                                  | 0.2141                        | 0.2224                         |
| 5 C    | <i>isoatp2116</i> |                                                  | 0.3904                        | 0.3527                         |
| 5 D    | <i>isoatp4056</i> |                                                  | <b>0.0024</b>                 | <b>0.0006</b>                  |
| 5 E    | <i>isoatp4134</i> |                                                  | <b>0.0159</b>                 | <b>0.0279</b>                  |
| 5 F    | <i>isoatp4548</i> |                                                  | 0.6194                        | 0.4967                         |
| 5 G    | <i>isoatp4550</i> |                                                  | <b>0.0259</b>                 | <b>&lt; 0.0001</b>             |
| 5 H    | <i>isoatp5126</i> |                                                  | 0.8399                        | 0.1655                         |
| 5 I    | <i>isoatp5621</i> |                                                  | <b>0.0311</b>                 | <b>0.0279</b>                  |
| 5 J    | <i>kat</i>        |                                                  | <b>0.0151</b>                 | <b>0.0001</b>                  |



**Table S2:** Summarizing number of glycosylation and myristoylation sites in different OATPs. The numbers of ASN glycosylation and myristoylation sites predicted from either outside (external) or inside (internal) regions of OATPs but not in the transmembrane regions are shown. Aa indicates total number of amino acids and TM indicates number of transmembrane regions.

| Organism                          | Accession    | Aa   | TM | Oatp Motif<br>(WxGxWWxG) | ASN Glycosylation sites |          |       | Myristoylation sites |          |       |
|-----------------------------------|--------------|------|----|--------------------------|-------------------------|----------|-------|----------------------|----------|-------|
|                                   |              |      |    |                          | Internal                | External | Total | Internal             | External | Total |
| <i>Aedes aegypti</i>              | XP_001658583 | 815  | 12 | +                        | 0                       | 5        | 5     | 1                    | 3        | 4     |
|                                   | XP_001659726 | 664  | 12 | +                        | 1                       | 4        | 5     | 2                    | 2        | 4     |
|                                   | XP_001660406 | 752  | 11 | +                        | 5                       | 4        | 9     | 2                    | 6        | 8     |
|                                   | XP_001660407 | 1266 | 11 | +                        | 6                       | 8        | 14    | 5                    | 16       | 21    |
| <i>Anopheles gambiae</i>          | XP_001661188 | 728  | 12 | +                        | 0                       | 5        | 5     | 4                    | 6        | 10    |
|                                   | XP_314819    | 650  | 10 | +                        | 5                       | 1        | 6     | 5                    | 3        | 8     |
|                                   | XP_316669    | 772  | 12 | +                        | 0                       | 4        | 4     | 3                    | 4        | 7     |
|                                   | XP_319187    | 822  | 12 | +                        | 2                       | 2        | 4     | 2                    | 6        | 8     |
|                                   | XP_557860    | 1301 | 13 | +                        | 6                       | 4        | 10    | 4                    | 20       | 24    |
| <i>Culex quinquefasciatus</i>     | XP_001237849 | 687  | 12 | +                        | 2                       | 4        | 6     | 4                    | 3        | 7     |
|                                   | EDS_26845    | 821  | 12 | +                        | 0                       | 2        | 2     | 2                    | 2        | 4     |
|                                   | EDS_34303    | 629  | 9  | +                        | 4                       | 3        | 7     | 1                    | 3        | 4     |
|                                   | EDS_45569    | 708  | 12 | +                        | 1                       | 5        | 6     | 1                    | 6        | 7     |
| <i>Pediculus humanus corporis</i> | EDS_45572    | 764  | 11 | +                        | 0                       | 4        | 4     | 3                    | 3        | 6     |
|                                   | EEB_11548    | 607  | 11 | +                        | 0                       | 6        | 6     | 2                    | 3        | 5     |
|                                   | EEB_18131    | 751  | 12 | +                        | 2                       | 7        | 9     | 0                    | 5        | 5     |
|                                   | EEB_20444    | 996  | 11 | +                        | 1                       | 7        | 8     | 2                    | 5        | 7     |
| <i>Rhipicephalus pulchellus</i>   | EEB_20468    | 864  | 12 | +                        | 2                       | 8        | 10    | 2                    | 6        | 8     |
|                                   | JAA_58190    | 748  | 12 | +                        | 1                       | 3        | 4     | 5                    | 3        | 8     |
|                                   | JAA_59396    | 585  | 10 | +                        | 0                       | 2        | 2     | 1                    | 5        | 6     |
|                                   | JAA_59849    | 798  | 12 | +                        | 0                       | 4        | 4     | 10                   | 4        | 14    |
| <i>Amblyomma americanum</i>       | JAA_64227    | 734  | 11 | +                        | 3                       | 0        | 3     | 4                    | 5        | 9     |
|                                   | ACH_98103    | 733  | 12 | +                        | 1                       | 1        | 2     | 2                    | 5        | 7     |
| <i>Ixodes scapularis</i>          | DAA_34891    | 668  | 12 | +                        | 2                       | 1        | 3     | 1                    | 2        | 3     |
|                                   | XP_002400770 | 590  | 12 | +                        | 0                       | 3        | 3     | 1                    | 2        | 3     |
|                                   | XP_002404592 | 528  | 10 | +                        | 2                       | 1        | 3     | 1                    | 2        | 3     |
|                                   | XP_002404594 | 290  | 6  | +                        | 0                       | 0        | 0     | 2                    | 2        | 4     |
|                                   | XP_002412161 | 576  | 11 | +                        | 1                       | 3        | 4     | 3                    | 5        | 8     |
|                                   | XP_002414101 | 701  | 7  | +                        | 5                       | 0        | 5     | 3                    | 4        | 7     |
|                                   | XP_002415171 | 257  | 5  | +                        | 0                       | 0        | 0     | 0                    | 3        | 3     |
| <i>Drosophila melanogaster</i>    | XP_002435666 | 648  | 12 | +                        | 1                       | 1        | 2     | 1                    | 7        | 8     |
|                                   | AAF46824     | 684  | 12 | +                        | 2                       | 2        | 4     | 1                    | 2        | 3     |
|                                   | AAF46825     | 680  | 12 | +                        | 1                       | 4        | 5     | 1                    | 4        | 5     |
|                                   | AAF46826     | 789  | 12 | +                        | 3                       | 6        | 9     | 1                    | 5        | 6     |
|                                   | AAF49332     | 819  | 12 | +                        | 2                       | 6        | 8     | 9                    | 4        | 13    |
|                                   | NP_609055    | 692  | 12 | +                        | 4                       | 2        | 6     | 4                    | 4        | 8     |
| NP_001260417                      | 745          | 11   | +  | 2                        | 6                       | 8        | 2     | 3                    | 5        |       |

**Table S3:** Summarizing number of phosphorylation sites in different OATPs. The numbers of cAMP, PKC, CK2 and tyrosine phosphorylation sites (predicted either outside or inside regions of OATPs but not in the transmembrane regions) are shown. Aa indicates total number of amino acids, TM indicates number of transmembrane regions, Int. indicates number of sites in the inside region and Ext. indicates number of sites on the outside regions of OATPs.

| Organism                          | Accession    | Aa   | TM | OATP Motif (WxGxW WxG) | CAMP_PHOSPHO |      |       | PKC_PHOSPHO |      |       | CK2_PHOSPHO |      |       | TYR_PHOSPHO |      |       |
|-----------------------------------|--------------|------|----|------------------------|--------------|------|-------|-------------|------|-------|-------------|------|-------|-------------|------|-------|
|                                   |              |      |    |                        | Int.         | Ext. | Total | Int.        | Ext. | Total | Int.        | Ext. | Total | Int.        | Ext. | Total |
| <i>Aedes aegypti</i>              | XP_001658583 | 815  | 12 | +                      | 2            | 0    | 2     | 4           | 7    | 11    | 3           | 10   | 13    | 0           | 0    | 0     |
|                                   | XP_001659726 | 664  | 12 | +                      | 0            | 0    | 0     | 5           | 4    | 9     | 2           | 6    | 8     | 0           | 1    | 1     |
|                                   | XP_001660406 | 752  | 11 | +                      | 0            | 1    | 1     | 0           | 7    | 7     | 4           | 5    | 9     | 0           | 0    | 0     |
|                                   | XP_001660407 | 1266 | 11 | +                      | 1            | 3    | 4     | 3           | 4    | 7     | 7           | 9    | 16    | 2           | 0    | 2     |
|                                   | XP_001661188 | 728  | 12 | +                      | 0            | 0    | 0     | 6           | 2    | 8     | 6           | 2    | 8     | 0           | 1    | 1     |
| <i>Anopheles gambiae</i>          | XP_314819    | 650  | 10 | +                      | 0            | 1    | 1     | 1           | 3    | 4     | 5           | 1    | 6     | 0           | 0    | 0     |
|                                   | XP_316669    | 772  | 12 | +                      | 1            | 0    | 1     | 6           | 3    | 9     | 4           | 4    | 8     | 0           | 1    | 1     |
|                                   | XP_319187    | 822  | 12 | +                      | 1            | 0    | 1     | 5           | 6    | 11    | 3           | 6    | 9     | 0           | 0    | 0     |
|                                   | XP_557860    | 1301 | 13 | +                      | 1            | 3    | 4     | 2           | 8    | 10    | 5           | 13   | 18    | 1           | 0    | 1     |
|                                   | XP_001237849 | 687  | 12 | +                      | 1            | 0    | 1     | 9           | 2    | 11    | 5           | 3    | 8     | 0           | 1    | 1     |
| <i>Culex quinquefasciatus</i>     | EDS_26845    | 821  | 12 | +                      | 2            | 0    | 2     | 6           | 5    | 11    | 2           | 6    | 8     | 0           | 1    | 1     |
|                                   | EDS_34303    | 629  | 9  | +                      | 1            | 0    | 1     | 2           | 3    | 5     | 3           | 0    | 3     | 0           | 0    | 0     |
|                                   | EDS_45569    | 708  | 12 | +                      | 0            | 0    | 0     | 3           | 5    | 8     | 3           | 4    | 7     | 0           | 1    | 1     |
|                                   | EDS_45572    | 764  | 11 | +                      | 0            | 0    | 0     | 6           | 5    | 11    | 2           | 8    | 10    | 0           | 1    | 1     |
| <i>Pediculus humanus corporis</i> | EEB_11548    | 607  | 11 | +                      | 0            | 0    | 0     | 2           | 1    | 3     | 1           | 1    | 2     | 0           | 1    | 1     |
|                                   | EEB_18131    | 751  | 12 | +                      | 1            | 1    | 2     | 2           | 2    | 4     | 4           | 5    | 9     | 0           | 2    | 2     |
|                                   | EEB_20444    | 996  | 11 | +                      | 2            | 0    | 2     | 5           | 5    | 10    | 7           | 12   | 19    | 0           | 1    | 1     |
|                                   | EEB_20468    | 864  | 12 | +                      | 1            | 0    | 1     | 6           | 3    | 9     | 5           | 4    | 9     | 1           | 1    | 2     |
| <i>Rhipicephalus pulchellus</i>   | JAA_58190    | 748  | 12 | +                      | 0            | 0    | 0     | 7           | 1    | 8     | 2           | 3    | 5     | 0           | 0    | 0     |
|                                   | JAA_59396    | 585  | 10 | +                      | 1            | 1    | 2     | 1           | 2    | 3     | 2           | 3    | 5     | 0           | 0    | 0     |
|                                   | JAA_59849    | 798  | 12 | +                      | 1            | 0    | 1     | 4           | 2    | 6     | 1           | 4    | 5     | 0           | 0    | 0     |
|                                   | JAA_64227    | 734  | 11 | +                      | 1            | 0    | 1     | 6           | 2    | 8     | 3           | 3    | 6     | 0           | 0    | 0     |
| <i>Amblyomma americanum</i>       | ACH_98103    | 733  | 12 | +                      | 2            | 1    | 3     | 4           | 2    | 6     | 4           | 3    | 7     | 0           | 0    | 0     |
| <i>Ixodes scapularis</i>          | DAA_34891    | 668  | 12 | +                      | 1            | 1    | 2     | 5           | 4    | 9     | 4           | 4    | 8     | 0           | 0    | 0     |
|                                   | XP_002400770 | 590  | 12 | +                      | 0            | 0    | 0     | 1           | 0    | 1     | 1           | 3    | 4     | 0           | 0    | 0     |
|                                   | XP_002404592 | 528  | 10 | +                      | 2            | 0    | 2     | 3           | 4    | 7     | 4           | 2    | 6     | 0           | 0    | 0     |
|                                   | XP_002404594 | 290  | 6  | +                      | 0            | 0    | 0     | 3           | 2    | 5     | 1           | 0    | 1     | 0           | 0    | 0     |
|                                   | XP_002412161 | 576  | 11 | +                      | 1            | 0    | 1     | 2           | 3    | 5     | 2           | 3    | 5     | 0           | 1    | 1     |
|                                   | XP_002414101 | 701  | 7  | +                      | 1            | 0    | 1     | 1           | 2    | 3     | 7           | 3    | 10    | 1           | 0    | 1     |
|                                   | XP_002415171 | 257  | 5  | +                      | 1            | 0    | 1     | 3           | 0    | 3     | 2           | 2    | 4     | 0           | 0    | 0     |
| XP_002435666                      | 648          | 12   | +  | 1                      | 0            | 1    | 3     | 3           | 6    | 4     | 1           | 5    | 1     | 0           | 1    |       |
| <i>Drosophila melanogaster</i>    | AAF46824     | 684  | 12 | +                      | 2            | 0    | 2     | 7           | 5    | 12    | 6           | 4    | 10    | 1           | 1    | 2     |
|                                   | AAF46825     | 680  | 12 | +                      | 0            | 0    | 0     | 5           | 5    | 10    | 2           | 2    | 4     | 0           | 1    | 1     |
|                                   | AAF46826     | 789  | 12 | +                      | 1            | 1    | 2     | 9           | 3    | 12    | 9           | 3    | 12    | 0           | 1    | 1     |
|                                   | AAF49332     | 819  | 12 | +                      | 2            | 0    | 2     | 3           | 2    | 5     | 6           | 4    | 10    | 2           | 0    | 2     |
|                                   | NP_609055    | 692  | 12 | +                      | 0            | 0    | 0     | 2           | 5    | 7     | 5           | 5    | 10    | 0           | 0    | 0     |
| NP_001260417                      | 745          | 11   | +  | 1                      | 1            | 2    | 4     | 5           | 9    | 2     | 6           | 8    | 0     | 0           | 0    |       |
